# Supplementary material
Source: PubMed Central journal article supplement (PMC1277807)
Supplement: nar_33_19_6258__1.pdf [file nar_33_19_6258__1.pdf]

## SUPPLEMENTAL MATERIAL

**Table S1:** Thermodynamic Parameters for seven Linearly Independent Sequences with Internal I-C Mismatches in 1 M NaCl.

| Propagation Sequence                    | $\Delta G_{37}$ (kcal/mol) | $\Delta H$ (kcal/mol) | $\Delta S$ (cal/K* $\mu$ mol) |
|-----------------------------------------|----------------------------|-----------------------|-------------------------------|
| A $\underline{I}$ A/T $\underline{C}$ T | -1.55 $\pm$ 0.09           | -13.8 $\pm$ 2.1       | -39.4 $\pm$ 2.1               |
| A $\underline{I}$ C/T $\underline{C}$ G | -2.03 $\pm$ 0.10           | -13.9 $\pm$ 2.2       | -38.1 $\pm$ 2.2               |
| A $\underline{I}$ G/T $\underline{C}$ C | -1.84 $\pm$ 0.11           | -17.2 $\pm$ 2.2       | -49.3 $\pm$ 2.2               |
| A $\underline{I}$ T/T $\underline{C}$ A | -1.85 $\pm$ 0.08           | -17.7 $\pm$ 2.0       | -50.9 $\pm$ 2.0               |
| C $\underline{I}$ A/G $\underline{C}$ T | -1.73 $\pm$ 0.11           | -10.3 $\pm$ 2.3       | -27.6 $\pm$ 2.3               |
| G $\underline{I}$ A/C $\underline{C}$ T | -1.45 $\pm$ 0.11           | -11.7 $\pm$ 2.3       | -33.0 $\pm$ 2.3               |
| T $\underline{I}$ A/A $\underline{C}$ T | -1.05 $\pm$ 0.09           | -10.8 $\pm$ 2.2       | -31.3 $\pm$ 2.2               |

**Table S2:** Thermodynamics of Duplex Formation of Oligonucleotides with Internal Inosine Mismatches.

| DNA Duplex I/C                               | 1/T <sub>m</sub> Method             |                                |                                        |                     | Curve fit Method                    |                                |                                        |
|----------------------------------------------|-------------------------------------|--------------------------------|----------------------------------------|---------------------|-------------------------------------|--------------------------------|----------------------------------------|
|                                              | $-\Delta G^{\circ}_{37}$ (kcal/mol) | $-\Delta H^{\circ}$ (kcal/mol) | $-\Delta S^{\circ}$ (cal/K* $\mu$ mol) | T <sub>M</sub> (°C) | $-\Delta G^{\circ}_{37}$ (kcal/mol) | $-\Delta H^{\circ}$ (kcal/mol) | $-\Delta S^{\circ}$ (cal/K* $\mu$ mol) |
| CGC $\underline{I}$ GAAC $\underline{I}$ GGC | 14.31 $\pm$ 0.48                    | 94.2 $\pm$ 6.2                 | 257.6 $\pm$ 18.4                       | 64.9                | 14.33 $\pm$ 0.26                    | 94.4 $\pm$ 2.7                 | 258.1 $\pm$ 8.0                        |
| CCG $\underline{I}$ CTGT $\underline{I}$ GCG | 14.00 $\pm$ 0.08                    | 90.6 $\pm$ 1.0                 | 247.1 $\pm$ 3.0                        | 64.7                | 14.31 $\pm$ 0.14                    | 94.9 $\pm$ 2.4                 | 259.7 $\pm$ 7.2                        |
| CGA $\underline{I}$ TCCA $\underline{I}$ TCC | 12.27 $\pm$ 0.11                    | 85.7 $\pm$ 1.9                 | 236.8 $\pm$ 5.6                        | 59.2                | 12.92 $\pm$ 0.07                    | 96.7 $\pm$ 1.8                 | 270.1 $\pm$ 5.6                        |
| CGA $\underline{I}$ TCCT $\underline{I}$ ACC | 11.79 $\pm$ 0.18                    | 87.7 $\pm$ 3.3                 | 244.9 $\pm$ 10.0                       | 56.8                | 11.83 $\pm$ 0.13                    | 88.2 $\pm$ 2.0                 | 246.3 $\pm$ 5.9                        |
| CAAAC $\underline{A}$ AAAG <sup>4</sup>      | 6.08 $\pm$ 0.12                     | 58.0 $\pm$ 2.9                 | 167.4 $\pm$ 10.0                       | 34.6                | Data not reported                   |                                |                                        |
| CAA $\underline{A}$ IAAAG <sup>4</sup>       | 6.51 $\pm$ 0.13                     | 66.0 $\pm$ 3.3                 | 191.8 $\pm$ 11.5                       | 36.9                | Data not reported                   |                                |                                        |
| CGC $\underline{I}$ AATTCGCG <sup>24</sup>   | 12.60 $\pm$ 0.25                    | 77.2 $\pm$ 3.9                 | 208.3 $\pm$ 12.5                       | 63.4                | Data not reported                   |                                |                                        |
| GTG $\underline{I}$ CTTC $\underline{I}$ GTC | 11.06 $\pm$ 0.12                    | 73.9 $\pm$ 2.3                 | 202.5 $\pm$ 7.0                        | 57.2                | 12.15 $\pm$ 0.17                    | 94.4 $\pm$ 3.3                 | 265.2 $\pm$ 10.6                       |
| GCA $\underline{T}$ IATCG                    | 8.51 $\pm$ 0.03                     | 67.7 $\pm$ 1.1                 | 190.9 $\pm$ 3.5                        | 46.3                | 8.57 $\pm$ 0.08                     | 70.2 $\pm$ 1.5                 | 198.8 $\pm$ 4.7                        |
| CGG $\underline{I}$ TCAG $\underline{I}$ TGC | 13.94 $\pm$ 0.16                    | 97.6 $\pm$ 2.4                 | 269.8 $\pm$ 7.2                        | 62.5                | 13.79 $\pm$ 0.35                    | 95.3 $\pm$ 5.4                 | 262.9 $\pm$ 16.3                       |
| GAA $\underline{I}$ CCTA $\underline{I}$ CCG | 12.26 $\pm$ 0.08                    | 87.2 $\pm$ 1.3                 | 241.7 $\pm$ 4.1                        | 58.8                | 12.13 $\pm$ 0.07                    | 85.1 $\pm$ 1.3                 | 235.2 $\pm$ 3.9                        |
| GAAG $\underline{I}$ ACG $\underline{I}$ AGG | 10.83 $\pm$ 0.05                    | 79.2 $\pm$ 1.1                 | 220.3 $\pm$ 3.3                        | 54.8                | 10.71 $\pm$ 0.04                    | 76.4 $\pm$ 1.3                 | 211.8 $\pm$ 4.2                        |
| CCA $\underline{I}$ GTGA $\underline{I}$ CCG | 13.67 $\pm$ 0.08                    | 93.2 $\pm$ 1.2                 | 256.3 $\pm$ 3.8                        | 62.7                | 13.80 $\pm$ 0.07                    | 95.1 $\pm$ 1.1                 | 262.2 $\pm$ 3.2                        |
| CCT $\underline{I}$ GTGT $\underline{I}$ CCG | 12.56 $\pm$ 0.11                    | 85.3 $\pm$ 1.9                 | 234.5 $\pm$ 5.7                        | 60.6                | 12.65 $\pm$ 0.11                    | 86.6 $\pm$ 1.3                 | 238.5 $\pm$ 3.8                        |
| CGT $\underline{I}$ CCAT $\underline{I}$ GGG | 12.25 $\pm$ 0.16                    | 87.7 $\pm$ 2.9                 | 243.4 $\pm$ 8.7                        | 58.6                | 11.60 $\pm$ 0.11                    | 75.4 $\pm$ 2.7                 | 205.6 $\pm$ 8.6                        |
| CCA $\underline{I}$ CTGT $\underline{I}$ CCG | 12.81 $\pm$ 0.07                    | 81.8 $\pm$ 1.0                 | 222.6 $\pm$ 2.9                        | 62.8                | 13.00 $\pm$ 0.18                    | 84.5 $\pm$ 2.3                 | 230.5 $\pm$ 6.7                        |
| CCA $\underline{I}$ GTGT $\underline{I}$ GCG | 13.09 $\pm$ 0.06                    | 89.0 $\pm$ 0.9                 | 244.6 $\pm$ 2.6                        | 61.7                | 12.96 $\pm$ 0.12                    | 86.8 $\pm$ 2.2                 | 238.0 $\pm$ 6.7                        |
| CGC $\underline{I}$ TCAC $\underline{I}$ TGG | 14.00 $\pm$ 0.08                    | 92.5 $\pm$ 1.2                 | 253.0 $\pm$ 3.6                        | 64.2                | 13.95 $\pm$ 0.08                    | 91.8 $\pm$ 1.5                 | 251.1 $\pm$ 4.7                        |

**Non-Two State Behavior  
or Outliers in Nearest  
Neighbor Determination**

|                                                                                     |              |             |                                       |      |              |                   |              |
|-------------------------------------------------------------------------------------|--------------|-------------|---------------------------------------|------|--------------|-------------------|--------------|
| CCGICAAGICCG                                                                        | 10.65 ± 0.04 | 59.3 ± 0.6  | 156.8 ± 1.8                           | 60.2 | 10.99 ± 0.11 | 64.3 ± 1.1        | 172.0 ± 3.2  |
| CGTIACCTIACC                                                                        |              |             | Non-Two State: Data could not be fit. |      |              |                   |              |
| CCAITTGCIACG                                                                        |              |             | Non-Two State: Data could not be fit. |      |              |                   |              |
| CGGICTTTIAGG                                                                        |              |             | Non-Two State: Data could not be fit. |      |              |                   |              |
| CCAITGGCIGCG                                                                        | 12.24 ± 0.50 | 74.3 ± 6.8  | 200.0 ± 20.5                          | 62.8 | 12.23 ± 0.72 | 73.8 ± 10.3       | 198.6 ± 30.8 |
| GCACIGTCG                                                                           | 11.86 ± 0.72 | 79.5 ± 10.2 | 218.2 ± 30.6                          | 59.3 | 11.84 ± 0.17 | 79.1 ± 2.0        | 217.0 ± 6.1  |
| CGAICCAAIGGG                                                                        | 11.30 ± 0.12 | 69.6 ± 2.1  | 188.0 ± 6.3                           | 59.8 | 11.49 ± 0.26 | 72.2 ± 4.0        | 195.9 ± 12.1 |
| <b>I/A</b>                                                                          |              |             |                                       |      |              |                   |              |
| CGCIGAACIGGC                                                                        | 12.45 ± 0.26 | 75.7 ± 3.8  | 203.9 ± 11.4                          | 63.3 | 13.05 ± 1.01 | 83.2 ± 14.9       | 226.1 ± 44.8 |
| CCGICAAGICCG                                                                        | 15.35 ± 0.22 | 95.1 ± 2.5  | 257.2 ± 7.3                           | 68.7 | 15.26 ± 0.05 | 94.2 ± 0.6        | 254.5 ± 1.9  |
| CGGICTGTIGCG                                                                        | 14.46 ± 0.17 | 94.6 ± 2.3  | 258.4 ± 6.7                           | 65.4 | 14.71 ± 0.42 | 98.2 ± 5.8        | 269.3 ± 17.3 |
| CGTIACCTIACC                                                                        | 8.85 ± 0.09  | 67.0 ± 3.1  | 187.5 ± 0.8                           | 48.1 | 8.87 ± 0.07  | 68.2 ± 2.4        | 191.4 ± 7.6  |
| CGAITCCAITCC                                                                        | 10.05 ± 0.05 | 76.4 ± 1.4  | 214.0 ± 4.3                           | 52.0 | 10.34 ± 0.08 | 84.5 ± 2.4        | 239.0 ± 7.6  |
| CGAITCCTIACC                                                                        | 9.47 ± 0.04  | 76.8 ± 1.5  | 217.1 ± 4.7                           | 49.3 | 9.51 ± 0.10  | 79.4 ± 4.5        | 225.4 ± 14.2 |
| CAAAA <sup>4</sup>                                                                  | 4.61 ± 0.09  | 48.0 ± 2.4  | 139.9 ± 8.4                           | 25.1 |              | Data not reported |              |
| CAA <sup>4</sup>                                                                    | 5.28 ± 0.11  | 63.0 ± 3.2  | 186.1 ± 11.2                          | 31.0 |              | Data not reported |              |
| CGCIAATTAGCG <sup>24</sup>                                                          | 9.45 ± 0.19  | 54.7 ± 2.7  | 145.9 ± 8.8                           | 54.5 |              | Data not reported |              |
| GCA <sup>4</sup>                                                                    | 7.00 ± 0.00  | 56.8 ± 0.6  | 160.4 ± 2.0                           | 39.6 | 7.01 ± 0.07  | 62.2 ± 1.5        | 178.0 ± 4.8  |
| GCACIGTCG                                                                           | 9.21 ± 0.04  | 61.7 ± 1.2  | 169.2 ± 3.7                           | 51.1 | 9.29 ± 0.14  | 63.8 ± 4.0        | 175.7 ± 12.6 |
| GCAGIGTCG                                                                           | 9.72 ± 0.05  | 63.8 ± 1.1  | 174.3 ± 3.4                           | 53.3 | 9.84 ± 0.13  | 66.2 ± 2.1        | 181.7 ± 6.5  |
| GCAAICTCG                                                                           | 9.12 ± 0.05  | 63.4 ± 1.5  | 175.1 ± 4.6                           | 50.2 | 9.32 ± 0.19  | 68.7 ± 3.4        | 191.3 ± 10.3 |
| CCAITGTGAICCG                                                                       | 12.60 ± 0.08 | 88.7 ± 1.3  | 245.4 ± 4.1                           | 59.8 | 12.63 ± 0.09 | 89.4 ± 1.8        | 247.4 ± 5.7  |
| CCTIGTGTICCG                                                                        | 11.37 ± 0.08 | 84.0 ± 1.7  | 234.0 ± 5.1                           | 56.0 | 11.18 ± 0.02 | 80.3 ± 0.4        | 223.0 ± 1.2  |
| CCAICTGTICCG                                                                        | 12.47 ± 0.04 | 86.2 ± 0.6  | 237.7 ± 1.9                           | 59.9 | 12.47 ± 0.05 | 86.3 ± 0.8        | 237.9 ± 2.4  |
| CCAITGTGTIGCG                                                                       | 11.80 ± 0.13 | 82.1 ± 2.4  | 226.6 ± 7.4                           | 58.3 | 11.88 ± 0.10 | 83.5 ± 1.2        | 231.0 ± 3.7  |
| CGCITCACITGG                                                                        | 9.73 ± 0.09  | 56.7 ± 1.9  | 151.3 ± 6.0                           | 55.6 | 9.91 ± 0.26  | 59.7 ± 4.8        | 160.4 ± 14.7 |
| GAAGIACGIAGG                                                                        | 10.38 ± 0.05 | 75.8 ± 1.1  | 210.8 ± 3.3                           | 53.6 | 10.25 ± 0.08 | 72.2 ± 2.2        | 199.7 ± 6.8  |
| <b>Non-Two State Behavior<br/>or Outliers in Nearest<br/>Neighbor Determination</b> |              |             |                                       |      |              |                   |              |
| CCAITTGCIACG                                                                        |              |             | Non-Two State: Data could not be fit. |      |              |                   |              |
| GTGICTTCIGTC                                                                        |              |             | Non-Two State: Data could not be fit. |      |              |                   |              |
| CGGICTTTIAGG                                                                        |              |             | Non-Two State: Data could not be fit. |      |              |                   |              |
| CCAITGGCIGCG                                                                        |              |             | Non-Two State: Data could not be fit. |      |              |                   |              |
| CGAICCAAIGGG                                                                        | 10.91 ± 0.07 | 72.1 ± 1.3  | 197.4 ± 4.1                           | 57.0 | 11.08 ± 0.12 | 75.2 ± 1.8        | 206.7 ± 5.5  |
| CGTICCATIGGG                                                                        | 10.11 ± 0.11 | 71.0 ± 2.6  | 196.4 ± 7.9                           | 53.5 | 10.00 ± 0.05 | 68.1 ± 1.8        | 187.5 ± 5.6  |
| <b>I/T</b>                                                                          |              |             |                                       |      |              |                   |              |
| CGCIGAACIGGC                                                                        | 10.11 ± 0.14 | 68.0 ± 3.3  | 186.7 ± 10.1                          | 54.2 | 10.68 ± 0.42 | 80.7 ± 7.9        | 225.8 ± 24.4 |
| CCGICAAGICCG                                                                        | 11.86 ± 0.67 | 95.1 ± 12.1 | 268.3 ± 37.0                          | 55.4 | 11.05 ± 0.17 | 79.4 ± 4.0        | 220.3 ± 12.3 |
| CGTIACCTIACC                                                                        | 7.43 ± 0.01  | 76.9 ± 1.9  | 223.9 ± 6.0                           | 40.7 | 7.42 ± 0.15  | 70.8 ± 17.4       | 204.4 ± 56.4 |
| CGAITCCAITCC                                                                        | 7.55 ± 0.02  | 71.4 ± 2.0  | 205.9 ± 6.3                           | 41.5 | 7.51 ± 0.09  | 63.1 ± 1.8        | 179.4 ± 6.0  |
| CGAITCCTIACC                                                                        | 7.26 ± 0.02  | 72.7 ± 2.4  | 210.9 ± 7.8                           | 40.2 | 7.26 ± 0.08  | 67.8 ± 1.0        | 195.1 ± 3.2  |

|                                                                                     |              |            |                                       |      |              |                   |              |
|-------------------------------------------------------------------------------------|--------------|------------|---------------------------------------|------|--------------|-------------------|--------------|
| CCAITTGCIACG                                                                        | 8.12 ± 0.02  | 71.7 ± 1.3 | 205.1 ± 4.1                           | 44.0 | 8.02 ± 0.08  | 63.7 ± 1.8        | 179.6 ± 5.9  |
| CAAATAAAG <sup>4</sup>                                                              | 4.04 ± 0.08  | 50.0 ± 2.5 | 148.2 ± 8.9                           | 22.3 |              | Data not reported |              |
| CAAATAAAG <sup>4</sup>                                                              | 3.82 ± 0.08  | 58.0 ± 2.9 | 174.7 ± 10.5                          | 23.1 |              | Data not reported |              |
| CGCIAATTIGCG <sup>24</sup>                                                          | 8.66 ± 0.17  | 58.9 ± 2.9 | 162.0 ± 9.7                           | 48.6 |              | Data not reported |              |
| GTGICTTCIGTC                                                                        | 7.96 ± 0.01  | 60.6 ± 0.8 | 169.9 ± 2.6                           | 44.5 | 7.85 ± 0.09  | 52.4 ± 0.6        | 143.7 ± 1.9  |
| CCAITGGCIGCG                                                                        | 10.01 ± 0.08 | 76.5 ± 2.0 | 214.3 ± 6.2                           | 51.7 | 9.72 ± 0.04  | 68.6 ± 2.6        | 189.8 ± 8.1  |
| GCATIATCG                                                                           | 7.00 ± 0.00  | 56.8 ± 0.6 | 160.4 ± 8.0                           | 39.6 | 7.00 ± 0.07  | 62.2 ± 1.5        | 178.0 ± 4.8  |
| GCACIGTCG                                                                           | 7.56 ± 0.07  | 46.3 ± 2.7 | 124.9 ± 8.5                           | 44.0 | 7.71 ± 0.15  | 53.0 ± 4.7        | 145.9 ± 14.6 |
| GCAGIGTCG                                                                           | 7.84 ± 0.04  | 54.6 ± 1.9 | 150.7 ± 5.9                           | 44.6 | 8.09 ± 0.10  | 66.0 ± 0.8        | 186.6 ± 2.7  |
| GAAGIACGIAGG                                                                        | 7.53 ± 0.03  | 62.6 ± 2.5 | 177.5 ± 7.9                           | 42.0 | 7.55 ± 0.08  | 65.0 ± 2.4        | 185.2 ± 7.6  |
| CCTIGTGTICCG                                                                        | 8.99 ± 0.15  | 79.5 ± 5.6 | 227.2 ± 17.7                          | 46.9 | 8.87 ± 0.16  | 74.1 ± 2.4        | 210.2 ± 7.4  |
| CGTICCATIGGG                                                                        | 7.44 ± 0.05  | 75.2 ± 4.1 | 218.3 ± 13.3                          | 40.8 | 7.50 ± 0.15  | 70.0 ± 13.4       | 201.5 ± 43.4 |
| CCAICTGTICCG                                                                        | 9.88 ± 0.03  | 82.1 ± 1.0 | 232.7 ± 3.2                           | 50.2 | 9.91 ± 0.04  | 83.1 ± 1.1        | 235.8 ± 3.4  |
| CCAIGTGTIGCG                                                                        | 8.61 ± 0.03  | 70.6 ± 1.9 | 199.9 ± 5.9                           | 46.4 | 8.64 ± 0.08  | 72.3 ± 2.4        | 205.2 ± 7.7  |
| CGCITCACITGG                                                                        | 10.44 ± 0.08 | 86.0 ± 2.3 | 243.5 ± 7.3                           | 51.8 | 10.36 ± 0.11 | 83.7 ± 2.3        | 236.4 ± 7.0  |
| <b>Non-Two State Behavior<br/>or Outliers in Nearest<br/>Neighbor Determination</b> |              |            |                                       |      |              |                   |              |
| CCGICTGTIGCG                                                                        | 8.30 ± 0.02  | 49.1 ± 0.7 | 131.4 ± 2.3                           | 48.6 | 8.45 ± 0.13  | 54.2 ± 2.1        | 147.5 ± 6.5  |
| CGGITCCGITCC                                                                        |              |            | Non-Two State: Data could not be fit. |      |              |                   |              |
| CGGICTTTIAGG                                                                        |              |            | Non-Two State: Data could not be fit. |      |              |                   |              |
| CGTIGCCTIGCC                                                                        | 7.74 ± 0.17  | 45.8 ± 4.5 | 122.7 ± 14.2                          | 45.4 | 7.82 ± 0.18  | 50.6 ± 3.6        | 137.9 ± 11.6 |
| CCAIGTGAICCG                                                                        | 9.12 ± 0.06  | 96.6 ± 3.8 | 282.1 ± 12.0                          | 45.5 | 8.73 ± 0.38  | 72.1 ± 8.2        | 204.3 ± 25.2 |
| <b>I/G</b>                                                                          |              |            |                                       |      |              |                   |              |
| CCGICAAGIICCG                                                                       | 11.80 ± 0.10 | 79.4 ± 1.7 | 218.1 ± 5.1                           | 59.0 | 11.54 ± 0.14 | 74.5 ± 3.2        | 203.1 ± 9.8  |
| CCGICTGTIGCG                                                                        | 10.50 ± 0.10 | 80.0 ± 2.0 | 224.2 ± 6.1                           | 53.2 | 10.41 ± 0.06 | 78.0 ± 1.4        | 218.0 ± 4.3  |
| CGTIACCTIACC                                                                        | 6.17 ± 0.27  | 59.0 ± 7.7 | 170.3 ± 25.0                          | 35.1 | 6.17 ± 0.19  | 61.0 ± 2.8        | 176.8 ± 9.0  |
| CGAITCCAITCC                                                                        | 8.04 ± 0.04  | 68.4 ± 2.4 | 194.7 ± 7.5                           | 44.0 | 8.11 ± 0.08  | 72.6 ± 1.1        | 207.9 ± 3.4  |
| CGAITCCTIACC                                                                        | 6.94 ± 0.04  | 68.0 ± 3.3 | 196.8 ± 10.7                          | 38.9 | 6.96 ± 0.10  | 63.0 ± 2.7        | 180.7 ± 8.8  |
| GTGICTTCIGTC                                                                        | 7.77 ± 0.03  | 54.2 ± 2.3 | 149.7 ± 7.5                           | 44.2 | 7.79 ± 0.09  | 51.0 ± 2.7        | 139.4 ± 8.8  |
| CAAAGAAAG <sup>4</sup>                                                              | 3.83 ± 0.08  | 52.0 ± 2.6 | 155.3 ± 9.3                           | 21.7 |              | Data not reported |              |
| CAAATAAAG <sup>4</sup>                                                              | 4.27 ± 0.09  | 57.0 ± 2.9 | 170.0 ± 10.2                          | 25.2 |              | Data not reported |              |
| CGCIAATTGGCG <sup>24</sup>                                                          | 6.47 ± 0.13  | 40.8 ± 2.0 | 110.7 ± 6.6                           | 36.5 |              | Data not reported |              |
| GCATIATCG                                                                           | 5.67 ± 0.07  | 52.2 ± 2.4 | 150.0 ± 8.0                           | 32.0 | 5.56 ± 0.04  | 57.7 ± 2.4        | 168.0 ± 7.7  |
| GCACIGTCG                                                                           | 7.25 ± 0.02  | 48.3 ± 1.8 | 132.4 ± 5.7                           | 41.7 | 7.33 ± 0.10  | 53.5 ± 4.0        | 148.8 ± 12.6 |
| CGGITCCGITCC                                                                        | 8.33 ± 0.05  | 59.7 ± 1.9 | 165.6 ± 6.0                           | 46.6 | 8.28 ± 0.04  | 56.9 ± 2.0        | 156.8 ± 6.4  |
| GAAGIACGIAGG                                                                        | 7.43 ± 0.05  | 60.3 ± 3.1 | 170.3 ± 9.9                           | 41.7 | 7.43 ± 0.06  | 58.3 ± 2.3        | 164.0 ± 7.1  |
| CCAIGTGAICCG                                                                        | 9.46 ± 0.03  | 75.5 ± 1.1 | 212.8 ± 3.3                           | 49.5 | 9.24 ± 0.09  | 68.2 ± 0.6        | 190.1 ± 1.6  |
| CCTIGTGTICCG                                                                        | 7.86 ± 0.01  | 62.0 ± 1.2 | 174.6 ± 3.8                           | 43.8 | 7.87 ± 0.04  | 61.6 ± 1.6        | 173.1 ± 5.0  |
| CCAICTGTICCG                                                                        | 9.94 ± 0.02  | 79.9 ± 0.7 | 225.4 ± 2.2                           | 50.8 | 9.97 ± 0.03  | 81.0 ± 1.7        | 228.9 ± 5.4  |
| CCAIGTGTIGCG                                                                        | 7.96 ± 0.03  | 48.6 ± 1.7 | 130.6 ± 5.5                           | 47.1 | 8.09 ± 0.15  | 55.7 ± 5.5        | 153.4 ± 17.3 |
| <b>Non-Two State Behavior<br/>or Outliers in Nearest<br/>Neighbor Determination</b> |              |            |                                       |      |              |                   |              |

|                                                                                     |              |            |                                       |      |              |            |              |
|-------------------------------------------------------------------------------------|--------------|------------|---------------------------------------|------|--------------|------------|--------------|
| CGCIGAACIGGC                                                                        | ?            | ?          | ?                                     | ?    | ?            | ?          | ?            |
| CGTIGCCTIGCC                                                                        | 6.64 ± 0.03  | 30.5 ± 1.2 | 76.8 ± 4.0                            | 38.1 | 6.66 ± 0.07  | 33.4 ± 3.5 | 86.1 ± 11.2  |
| CCAITTGCIACG                                                                        |              |            | Non-Two State: Data could not be fit. |      |              |            |              |
| CGGICTTTIAGG                                                                        |              |            | Non-Two State: Data could not be fit. |      |              |            |              |
| CCAITGGCIGCG                                                                        |              |            | Non-Two State: Data could not be fit. |      |              |            |              |
| CGAICCAAIGGG                                                                        | 7.33 ± 0.00  | 42.3 ± 0.5 | 112.7 ± 1.8                           | 42.9 | 7.38 ± 0.06  | 45.1 ± 3.3 | 121.7 ± 10.6 |
| CGTICCATIGGG                                                                        | 6.40 ± 0.06  | 36.8 ± 1.6 | 98.0 ± 5.4                            | 35.9 | 6.29 ± 0.11  | 41.6 ± 3.2 | 114.0 ± 10.1 |
| CGCITCACITGG                                                                        |              |            | Non-Two State: Data could not be fit. |      |              |            |              |
| <b>I/I</b>                                                                          |              |            |                                       |      |              |            |              |
| CGCIGAACIGGC                                                                        | 8.72 ± 0.27  | 60.0 ± 6.5 | 165.4 ± 20.3                          | 48.7 | 8.88 ± 0.24  | 62.7 ± 8.1 | 173.4 ± 25.5 |
| CCGICAAGICCG                                                                        | 10.37 ± 0.08 | 66.6 ± 1.9 | 181.2 ± 5.8                           | 56.0 | 10.70 ± 0.37 | 73.2 ± 8.7 | 201.5 ± 27.1 |
| CGAITCCAITCC                                                                        | 7.53 ± 0.05  | 77.7 ± 4.0 | 226.3 ± 12.8                          | 41.0 | 7.51 ± 0.09  | 73.8 ± 1.5 | 213.6 ± 4.7  |
| CGAITCCTIACC                                                                        | 6.37 ± 0.03  | 65.4 ± 1.8 | 190.3 ± 5.9                           | 36.2 | 6.38 ± 0.11  | 64.3 ± 3.5 | 186.6 ± 11.5 |
| GTGICTTCIGTG                                                                        | 7.19 ± 0.07  | 61.9 ± 4.1 | 176.5 ± 13.2                          | 40.4 | 7.19 ± 0.12  | 55.1 ± 2.0 | 154.3 ± 6.3  |
| CGGICTTTIAGG                                                                        | 6.35 ± 0.05  | 48.5 ± 2.9 | 136.0 ± 9.6                           | 35.8 | 6.31 ± 0.04  | 53.6 ± 2.8 | 152.3 ± 9.0  |
| CAAAlAAAG <sup>4</sup>                                                              | 4.04 ± 0.08  | 47.0 ± 2.4 | 138.5 ± 8.3                           | 21.4 | -            | -          | -            |
| GCATIATCG                                                                           | 5.51 ± 0.02  | 56.9 ± 0.7 | 165.6 ± 2.3                           | 31.6 | 5.32 ± 0.34  | 61.9 ± 6.4 | 182.3 ± 21.6 |
| GCACIGTCG                                                                           | 7.13 ± 0.02  | 47.6 ± 1.5 | 130.4 ± 4.8                           | 40.9 | 7.19 ± 0.07  | 52.1 ± 4.9 | 144.9 ± 15.6 |
| GAAGIACGIAGG                                                                        | 6.95 ± 0.00  | 59.1 ± 0.7 | 168.3 ± 2.2                           | 39.2 | 6.95 ± 0.05  | 64.0 ± 2.5 | 183.9 ± 7.9  |
| <b>Non-Two State Behavior<br/>or Outliers in Nearest<br/>Neighbor Determination</b> |              |            |                                       |      |              |            |              |
| CCGICTGTIGCG                                                                        | 13.57 ± 0.07 | 86.4 ± 1.0 | 234.7 ± 2.9                           | 64.5 | 13.88 ± 0.24 | 90.3 ± 2.8 | 246.5 ± 8.1  |
| CGTIACCTIACC                                                                        |              |            | Non-Two State: Data could not be fit. |      |              |            |              |
| CCAITTGCIACG                                                                        |              |            | Non-Two State: Data could not be fit. |      |              |            |              |
| CCAITGGCIGCG                                                                        |              |            | Non-Two State: Data could not be fit. |      |              |            |              |

**Table S3:** Thermodynamics of Duplex Formation of Oligonucleotides with Internal Tandem I-I Mismatches.

| <u>DNA Duplex</u>             | <u>1/T<sub>m</sub> Method</u>          |                                   |                                               |                                          | <u>Curve fit Method</u>                |                                   |                                               |
|-------------------------------|----------------------------------------|-----------------------------------|-----------------------------------------------|------------------------------------------|----------------------------------------|-----------------------------------|-----------------------------------------------|
|                               | $-\Delta G^{\circ}_{37}$<br>(kcal/mol) | $-\Delta H^{\circ}$<br>(kcal/mol) | $-\Delta S^{\circ}$<br>(cal/K* $\text{mol}$ ) | T <sub>M</sub><br>( $^{\circ}\text{C}$ ) | $-\Delta G^{\circ}_{37}$<br>(kcal/mol) | $-\Delta H^{\circ}$<br>(kcal/mol) | $-\Delta S^{\circ}$<br>(cal/K* $\text{mol}$ ) |
| GGTAI <sub>I</sub> IGTGTCG    |                                        |                                   |                                               |                                          |                                        |                                   |                                               |
| II/C C                        | 12.18 ± 0.06                           | 93.8 ± 1.2                        | 263.3 ± 3.8                                   | 56.9                                     | 12.20 ± 0.11                           | 94.5 ± 2.3                        | 265.2 ± 7.1                                   |
| II/A C                        | 10.78 ± 0.04                           | 86.3 ± 1.1                        | 243.3 ± 3.3                                   | 53.1                                     | 10.83 ± 0.03                           | 87.4 ± 0.4                        | 246.8 ± 1.4                                   |
| GGTTI <sub>I</sub> IGAGTCG    |                                        |                                   |                                               |                                          |                                        |                                   |                                               |
| II/C A                        | 10.44 ± 0.13                           | 84.0 ± 3.3                        | 237.1 ± 10.1                                  | 52.1                                     | 10.75 ± 0.12                           | 92.7 ± 2.9                        | 264.3 ± 9.2                                   |
| II/A A                        | 11.29 ± 0.12                           | 83.4 ± 2.3                        | 232.6 ± 7.1                                   | 55.8                                     | 11.67 ± 0.24                           | 91.5 ± 5.4                        | 257.3 ± 16.6                                  |
| II/T A                        | 9.37 ± 0.06                            | 77.3 ± 2.2                        | 218.9 ± 6.8                                   | 48.8                                     | 9.60 ± 0.21                            | 85.0 ± 4.9                        | 243.2 ± 15.1                                  |
| II/G A                        | 9.53 ± 0.04                            | 81.2 ± 1.2                        | 231.2 ± 3.8                                   | 48.9                                     | 9.50 ± 0.04                            | 80.0 ± 0.9                        | 227.4 ± 2.7                                   |
| GGTGC <sub>I</sub> IGGTCG     |                                        |                                   |                                               |                                          |                                        |                                   |                                               |
| II/C T                        | 12.07 ± 0.08                           | 87.8 ± 1.4                        | 244.2 ± 4.3                                   | 57.9                                     | 12.18 ± 0.03                           | 89.8 ± 0.6                        | 250.4 ± 2.0                                   |
| II/A T                        | 11.34 ± 0.04                           | 85.0 ± 0.9                        | 237.5 ± 2.7                                   | 55.6                                     | 11.33 ± 0.06                           | 84.6 ± 1.1                        | 236.3 ± 3.5                                   |
| II/T T                        | 9.96 ± 0.02                            | 78.5 ± 0.7                        | 220.8 ± 2.1                                   | 51.2                                     | 9.88 ± 0.02                            | 75.9 ± 1.0                        | 213.0 ± 3.1                                   |
| II/G T                        | 10.82 ± 0.05                           | 84.3 ± 1.2                        | 236.8 ± 3.6                                   | 53.6                                     | 10.65 ± 0.06                           | 80.5 ± 0.9                        | 225.0 ± 2.7                                   |
| GGTTI <sub>I</sub> IAGTTCG    |                                        |                                   |                                               |                                          |                                        |                                   |                                               |
| II/T G                        | 6.39 ± 0.13                            | 57.0 ± 4.7                        | 163.3 ± 15.3                                  | 36.3                                     | 6.45 ± 0.14                            | 57.8 ± 8.0                        | 165.5 ± 26.1                                  |
| II/G G                        | 6.34 ± 0.07                            | 66.0 ± 4.1                        | 192.5 ± 13.4                                  | 36.1                                     | 6.36 ± 0.06                            | 62.4 ± 5.1                        | 180.6 ± 16.6                                  |
| <b>Non-Two State Behavior</b> |                                        |                                   |                                               |                                          |                                        |                                   |                                               |
| GGTAI <sub>I</sub> IGTGTCG    |                                        |                                   |                                               |                                          |                                        |                                   |                                               |
| II/I I                        | 9.21 ± 0.15                            | 68.8 ± 3.7                        | 192.2 ± 11.4                                  | 49.6                                     | 9.80 ± 0.09                            | 83.8 ± 0.6                        | 238.4 ± 1.8                                   |
| GGTTI <sub>I</sub> IAGTTCG    |                                        |                                   |                                               |                                          |                                        |                                   |                                               |
| II/I I                        | 6.13 ± 0.04                            | 83.1 ± 3.8                        | 248.0 ± 12.3                                  | 35.5                                     | 6.25 ± 0.09                            | 67.3 ± 3.3                        | 197.0 ± 10.7                                  |
| GGTAI <sub>I</sub> IGTGTCG    |                                        |                                   |                                               |                                          |                                        |                                   |                                               |
| II/T C                        |                                        |                                   |                                               |                                          |                                        |                                   | Non-Two State: Data could not be fit.         |
| II/G C                        |                                        |                                   |                                               |                                          |                                        |                                   | Non-Two State: Data could not be fit.         |
| GGTTI <sub>I</sub> IAGTTCG    |                                        |                                   |                                               |                                          |                                        |                                   |                                               |
| II/C G                        |                                        |                                   |                                               |                                          |                                        |                                   | Non-Two State: Data could not be fit.         |
| II/A G                        |                                        |                                   |                                               |                                          |                                        |                                   | Non-Two State: Data could not be fit.         |

**Table S4:** Thermodynamics of duplex formation of oligonucleotides with internal tandem self-complementary inosine mismatch pairs.

| DNA Duplex             | 1/Tm Method                            |                                   |                                               |                                 | Curve fit Method                       |                                   |                                               |
|------------------------|----------------------------------------|-----------------------------------|-----------------------------------------------|---------------------------------|----------------------------------------|-----------------------------------|-----------------------------------------------|
|                        | $-\Delta G^{\circ}_{37}$<br>(kcal/mol) | $-\Delta H^{\circ}$<br>(kcal/mol) | $-\Delta S^{\circ}$<br>(cal/K* $\text{mol}$ ) | $T_M$<br>( $^{\circ}\text{C}$ ) | $-\Delta G^{\circ}_{37}$<br>(kcal/mol) | $-\Delta H^{\circ}$<br>(kcal/mol) | $-\Delta S^{\circ}$<br>(cal/K* $\text{mol}$ ) |
| GGT <u>AIC</u> GTG TCG | 12.40 $\pm$ 0.10                       | 87.2 $\pm$ 1.72                   | 241.2 $\pm$ 5.1                               | 59.4                            | 12.88 $\pm$ 0.10                       | 95.1 $\pm$ 0.72                   | 265.0 $\pm$ 2.1                               |
| CCA <u>TCI</u> CAC AGC |                                        |                                   |                                               |                                 |                                        |                                   |                                               |
| GGT <u>ACI</u> GTG TCG | 11.37 $\pm$ 0.06                       | 85.4 $\pm$ 1.3                    | 238.7 $\pm$ 3.9                               | 55.6                            | 11.55 $\pm$ 0.12                       | 89.03 $\pm$ 2.1                   | 249.8 $\pm$ 6.3                               |
| CCA <u>TIC</u> CAC AGC |                                        |                                   |                                               |                                 |                                        |                                   |                                               |
| GGT <u>TIA</u> GAG TCG | 11.28 $\pm$ 0.09                       | 80.98 $\pm$ 1.8                   | 224.8 $\pm$ 5.5                               | 56.3                            | 11.64 $\pm$ 0.23                       | 87.85 $\pm$ 4.3                   | 245.7 $\pm$ 13.2                              |
| CCA <u>AAI</u> CTC AGC |                                        |                                   |                                               |                                 |                                        |                                   |                                               |
| GGT <u>TAI</u> GAG TCG | 11.01 $\pm$ 0.21                       | 85.0 $\pm$ 4.8                    | 238.5 $\pm$ 14.6                              | 54.3                            | 11.02 $\pm$ 0.12                       | 85.1 $\pm$ 1.0                    | 238.8 $\pm$ 2.9                               |
| CCA <u>AIA</u> CTC AGC |                                        |                                   |                                               |                                 |                                        |                                   |                                               |
| GGT <u>TIG</u> AGT TCG | 6.81 $\pm$ 0.02                        | 67.0 $\pm$ 1.9                    | 194.0 $\pm$ 6.2                               | 38.3                            | 6.76 $\pm$ 0.09                        | 71.7 $\pm$ 4.9                    | 209.5 $\pm$ 16.1                              |
| CCA <u>AGI</u> TCA AGC |                                        |                                   |                                               |                                 |                                        |                                   |                                               |
| GGT <u>TGI</u> AGT TCG | 6.99 $\pm$ 0.01                        | 69.0 $\pm$ 1.6                    | 200.1 $\pm$ 5.2                               | 39.1                            | 6.99 $\pm$ 0.04                        | 69.5 $\pm$ 2.6                    | 201.6 $\pm$ 8.5                               |
| CCA <u>AIG</u> TCA AGC |                                        |                                   |                                               |                                 |                                        |                                   |                                               |
| GGT <u>GCI</u> TGG TCG | 10.21 $\pm$ 0.06                       | 77.4 $\pm$ 1.6                    | 216.7 $\pm$ 5.1                               | 52.5                            | 10.36 $\pm$ 0.10                       | 81.7 $\pm$ 1.8                    | 230.1 $\pm$ 5.7                               |
| CCA <u>CGT</u> ICC AGC |                                        |                                   |                                               |                                 |                                        |                                   |                                               |
| GGT <u>GCT</u> IGG TCG | 10.24 $\pm$ 0.41                       | 81.6 $\pm$ 8.9                    | 230.0 $\pm$ 27.6                              | 51.8                            | 10.35 $\pm$ 0.21                       | 84.5 $\pm$ 3.2                    | 239.1 $\pm$ 10.0                              |
| CCA <u>CGI</u> TCC AGC |                                        |                                   |                                               |                                 |                                        |                                   |                                               |
| GGT <u>AIA</u> GTG TCG | 11.52 $\pm$ 0.12                       | 84.2 $\pm$ 2.5                    | 234.3 $\pm$ 7.6                               | 56.5                            | 11.77 $\pm$ 0.19                       | 89.4 $\pm$ 3.0                    | 250.3 $\pm$ 9.1                               |
| CCA <u>TCI</u> CAC AGC |                                        |                                   |                                               |                                 |                                        |                                   |                                               |
| GGT <u>AIC</u> GTG TCG | 11.12 $\pm$ 0.05                       | 82.2 $\pm$ 1.0                    | 229.2 $\pm$ 3.2                               | 55.3                            | 11.41 $\pm$ 0.12                       | 88.2 $\pm$ 1.5                    | 247.5 $\pm$ 4.6                               |
| CCA <u>TAI</u> CAC AGC |                                        |                                   |                                               |                                 |                                        |                                   |                                               |
| GGT <u>TIG</u> AGT TCG | 7.25 $\pm$ 0.01                        | 72.1 $\pm$ 1.8                    | 208.9 $\pm$ 5.7                               | 40.1                            | 7.27 $\pm$ 0.04                        | 75.1 $\pm$ 0.70                   | 218.6 $\pm$ 2.2                               |
| CCA <u>ATI</u> TCA AGC |                                        |                                   |                                               |                                 |                                        |                                   |                                               |
| GGT <u>TIT</u> AGT TCG | 7.24 $\pm$ 0.06                        | 65.3 $\pm$ 3.8                    | 187.3 $\pm$ 12.4                              | 40.4                            | 7.27 $\pm$ 0.12                        | 73.0 $\pm$ 2.8                    | 212.0 $\pm$ 8.9                               |
| CCA <u>AGI</u> TCA AGC |                                        |                                   |                                               |                                 |                                        |                                   |                                               |

**Table S5:** Experimental thermodynamics parameters for internal tandem self-complementary inosine mismatch pairs.

| <b>DNA Duplex</b>      | <b><math>-\Delta G^{\circ}_{37}</math><br/>(kcal/mol)</b> | <b><math>-\Delta H^{\circ}</math><br/>(kcal/mol)</b> | <b><math>-\Delta S^{\circ}</math><br/>(cal/K*mol)</b> | <b><math>T_M</math><br/>(<math>^{\circ}C</math>)</b> |
|------------------------|-----------------------------------------------------------|------------------------------------------------------|-------------------------------------------------------|------------------------------------------------------|
| GGT <u>AIC</u> GTG TCG | 12.65 $\pm$ 0.07                                          | 93.9 $\pm$ 0.7                                       | 261.6 $\pm$ 1.9                                       | 58.9                                                 |
| CCA <u>TCI</u> CAC AGC |                                                           |                                                      |                                                       |                                                      |
| GGT <u>ACI</u> GTG TCG | 11.41 $\pm$ 0.05                                          | 86.4 $\pm$ 1.1                                       | 241.7 $\pm$ 3.3                                       | 55.6                                                 |
| CCA <u>TIC</u> CAC AGC |                                                           |                                                      |                                                       |                                                      |
| GGT <u>TIA</u> GAG TCG | 11.33 $\pm$ 0.08                                          | 82.0 $\pm$ 1.7                                       | 227.85 $\pm$ 5.1                                      | 56.3                                                 |
| CCA <u>AAI</u> CTC AGC |                                                           |                                                      |                                                       |                                                      |
| GGT <u>TAI</u> GAG TCG | 11.02 $\pm$ 0.11                                          | 85.1 $\pm$ 1.0                                       | 238.8 $\pm$ 2.9                                       | 54.3                                                 |
| CCA <u>AIA</u> CTC AGC |                                                           |                                                      |                                                       |                                                      |
| GGT <u>TIG</u> AGT TCG | 6.81 $\pm$ 0.02                                           | 67.6 $\pm$ 1.8                                       | 196.0 $\pm$ 5.8                                       | 38.3                                                 |
| CCA <u>AGI</u> TCA AGC |                                                           |                                                      |                                                       |                                                      |
| GGT <u>TGI</u> AGT TCG | 6.99 $\pm$ 0.01                                           | 69.2 $\pm$ 1.4                                       | 200.5 $\pm$ 4.5                                       | 39.1                                                 |
| CCA <u>AIG</u> TCA AGC |                                                           |                                                      |                                                       |                                                      |
| GGT <u>GCI</u> TGG TCG | 10.25 $\pm$ 0.05                                          | 79.3 $\pm$ 1.2                                       | 222.6 $\pm$ 3.8                                       | 52.5                                                 |
| CCA <u>CGT</u> ICC AGC |                                                           |                                                      |                                                       |                                                      |
| GGT <u>GCT</u> IGG TCG | 10.33 $\pm$ 0.18                                          | 84.2 $\pm$ 3.0                                       | 238.1 $\pm$ 9.4                                       | 51.7                                                 |
| CCA <u>CGI</u> TCC AGC |                                                           |                                                      |                                                       |                                                      |
| GGT <u>AIA</u> GTG TCG | 11.60 $\pm$ 0.10                                          | 86.3 $\pm$ 1.9                                       | 240.8 $\pm$ 5.8                                       | 56.4                                                 |
| CCA <u>TCI</u> CAC AGC |                                                           |                                                      |                                                       |                                                      |
| GGT <u>AIA</u> GTG TCG | 11.16 $\pm$ 0.05                                          | 84.1 $\pm$ 0.9                                       | 235.4 $\pm$ 2.6                                       | 54.9                                                 |
| CCA <u>TCI</u> CAC AGC |                                                           |                                                      |                                                       |                                                      |
| GGT <u>TIG</u> AGT TCG | 7.25 $\pm$ 0.01                                           | 74.7 $\pm$ 0.6                                       | 217.4 $\pm$ 2.0                                       | 40.0                                                 |
| CCA <u>ATI</u> TCA AGC |                                                           |                                                      |                                                       |                                                      |
| GGT <u>TIT</u> AGT TCG | 7.25 $\pm$ 0.05                                           | 70.3 $\pm$ 2.3                                       | 203.6 $\pm$ 7.2                                       | 39.8                                                 |
| CCA <u>AGI</u> TCA AGC |                                                           |                                                      |                                                       |                                                      |

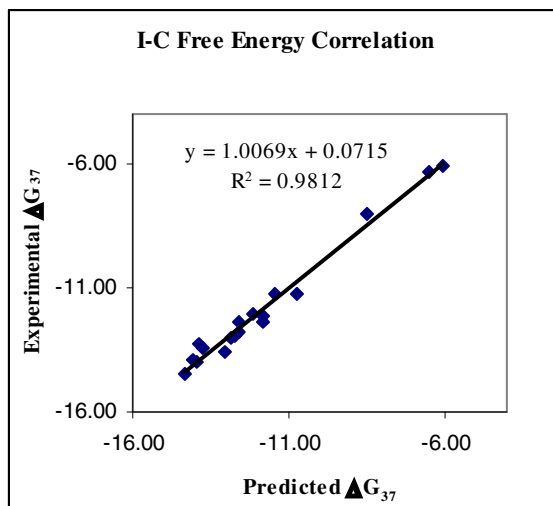

**Figure S1a:** Comparison of the experimental versus the predicted free energies of 18 I-C measurements. The average deviation is 0.26 kcal/mol.

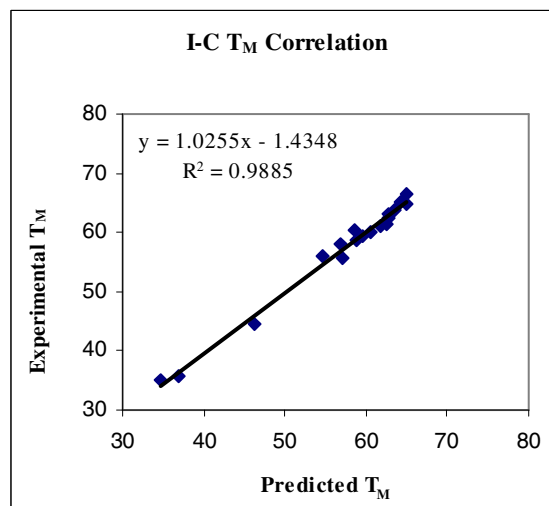

**Figure S1b:** Comparison of the experimental versus the predicted  $T_m$ 's of 18 I-C measurements. The average deviation is 0.8 °C.

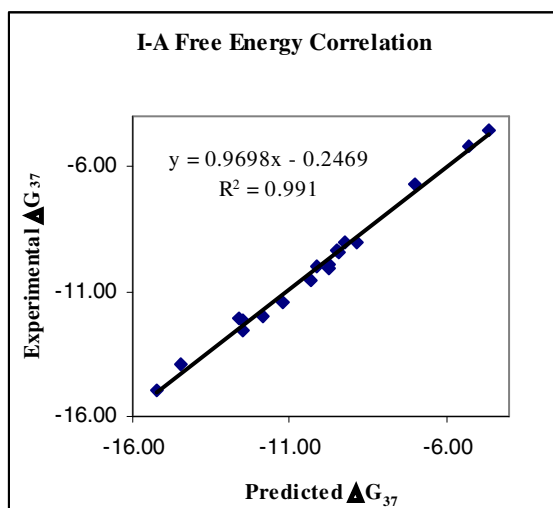

**Figure S2a:** Comparison of the experimental versus the predicted free energies of 19 I-A measurements. The average deviation is 0.20 kcal/mol.

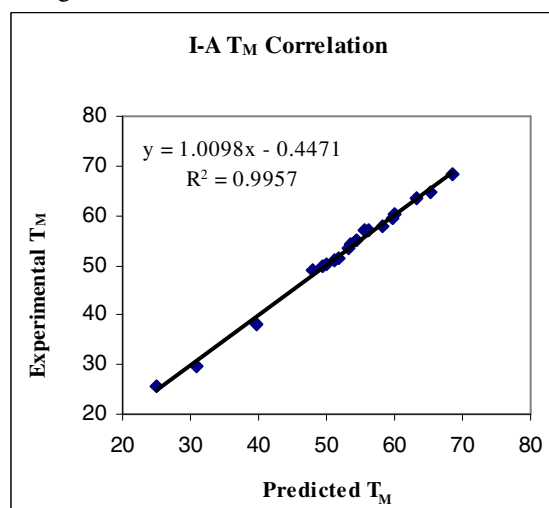

**Figure S2b:** Comparison of the experimental versus the predicted  $T_m$ 's of 19 I-A measurements. The average deviation is 0.6 °C.



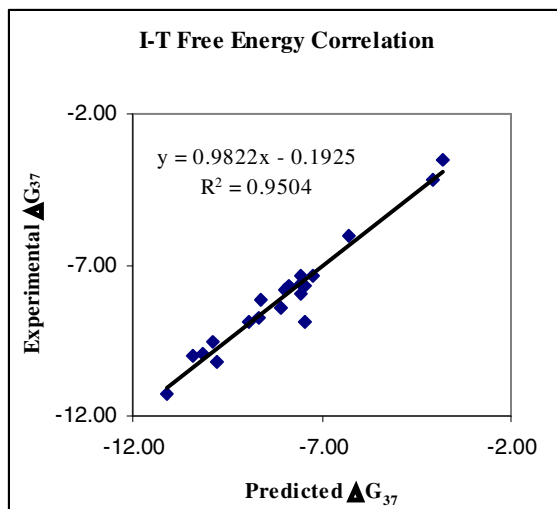

**Figure S3a:** Comparison of the experimental versus the predicted free energies of 20 I-T measurements. The average deviation is 0.30 kcal/mol.

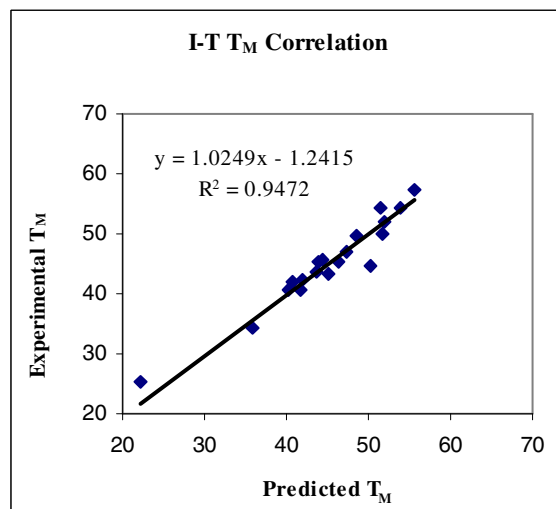

**Figure S3b:** Comparison of the experimental versus the predicted  $T_m$ 's of 20 I-T measurements. The average deviation is 1.6 ° C.

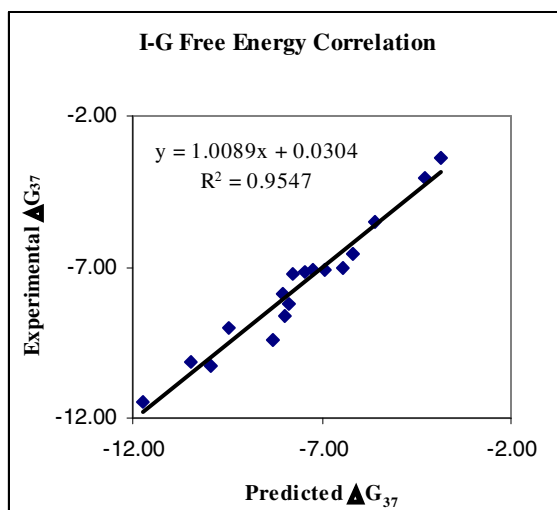

**FigureS4a:** Comparison of the experimental versus the predicted free energies of 17 I-G measurements. The average deviation is 0.34 kcal/mol.

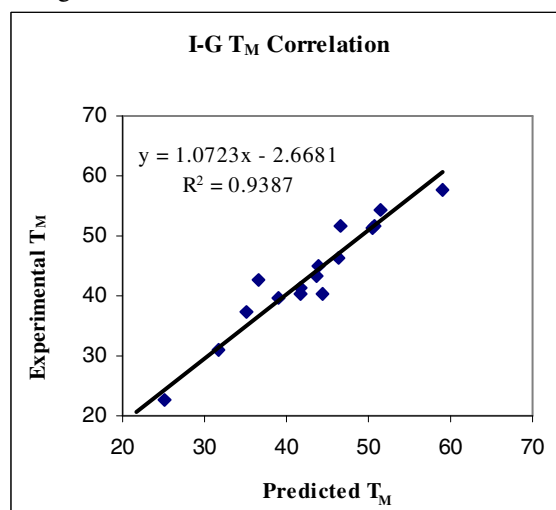

**Figure S4b:** Comparison of the experimental versus the predicted  $T_m$ 's of 17 I-G measurements. The average deviation is 2.0 ° C.

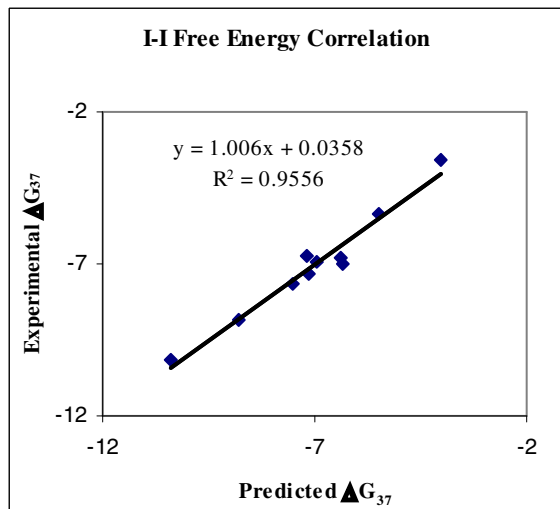

**Figure S5a:** Comparison of the experimental versus the predicted free energies of 10 I-I measurements. The average deviation is 0.29 kcal/mol.

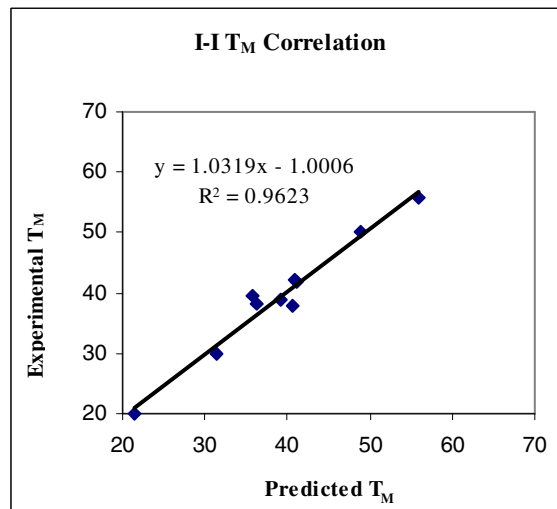

**Figure S5b:** Comparison of the experimental versus the predicted  $T_M$ 's of 10 I-I measurements. The average deviation is 1.5 °C.

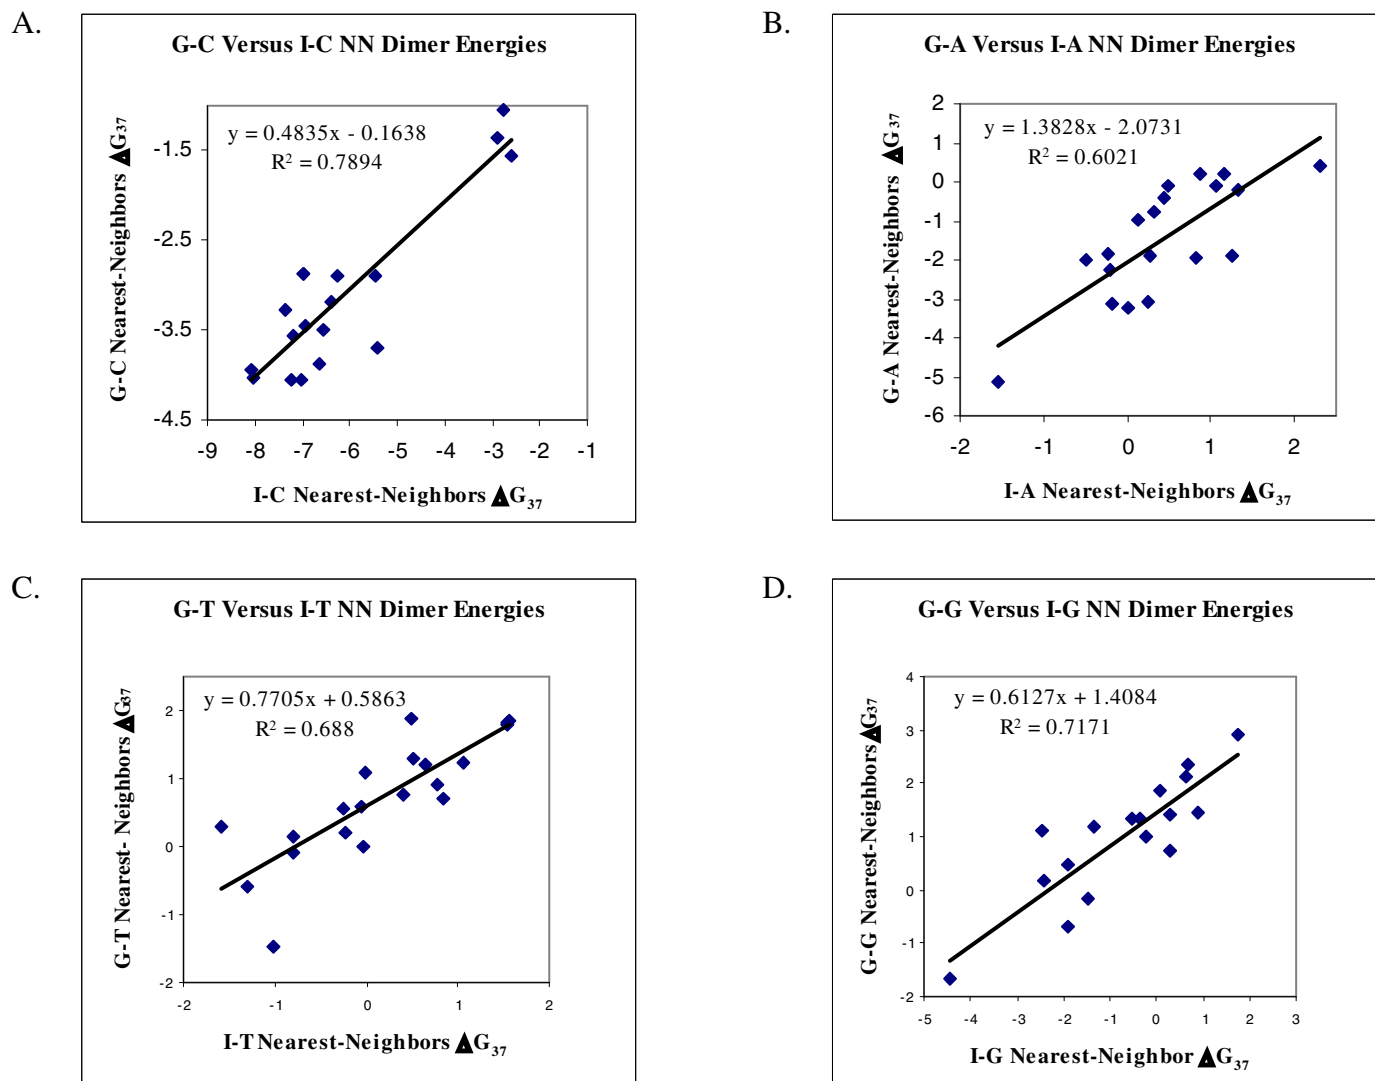

**Figure S6:** Comparison of G•X with I•X dimer nearest-neighbor  $\Delta G_{37}^{\circ}$  parameters.
